# Supplementary material
Source: publisher figshare collection journal article supplement (https://asha.figshare.com/ndownloader/files/33524690)
Supplement: Supplementary file 1 [file 33524690]

**Supplemental Material S1.** Endoscopic images that were provided to the raters for rating YPRSRS/BRACS and VASES ratings.

# Valleculae (Yale); Oropharynx (VASES)

None

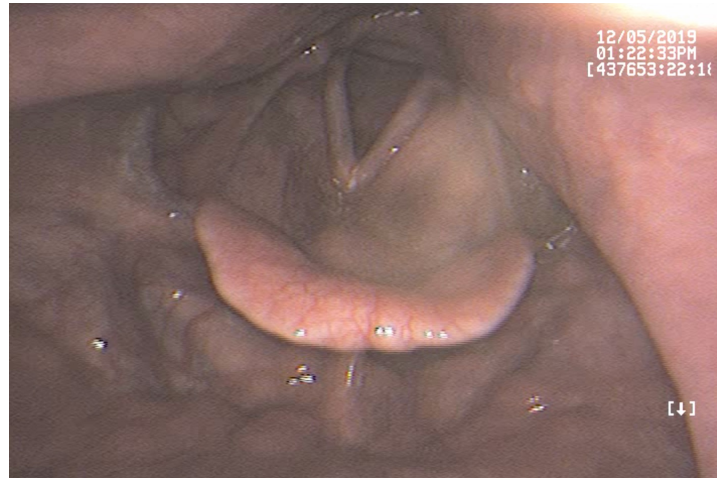

Trace

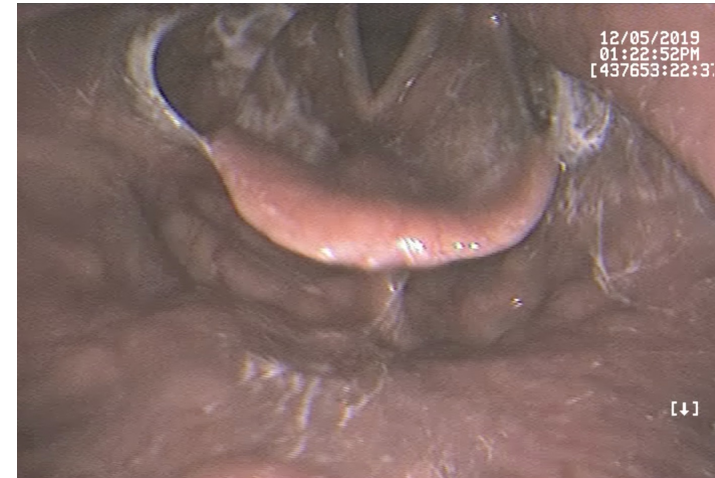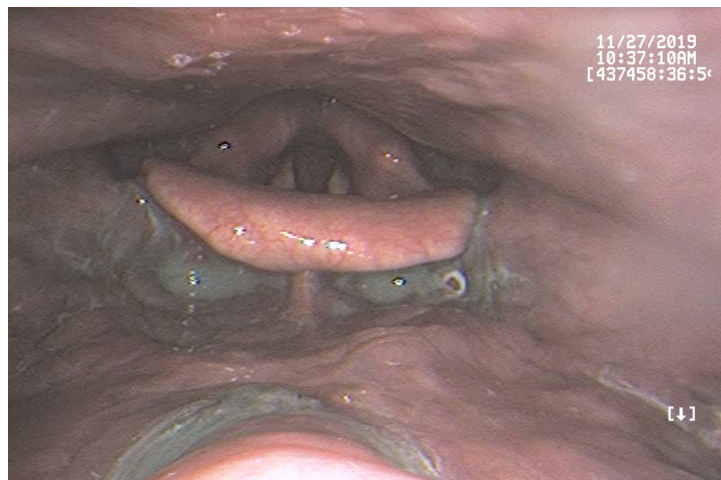

Mild

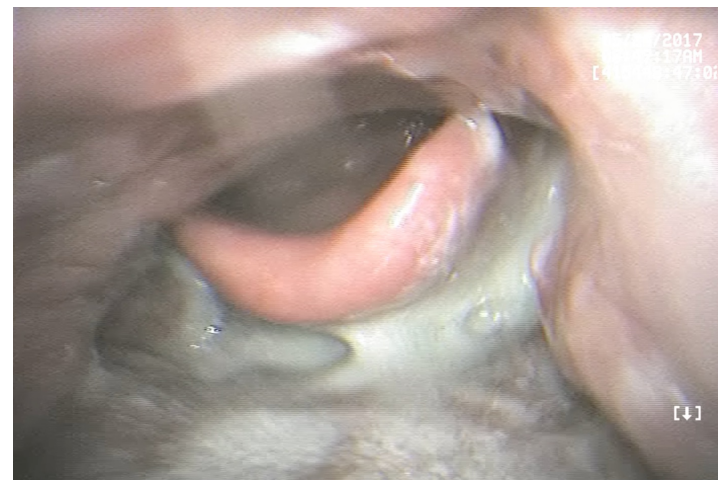

Moderate

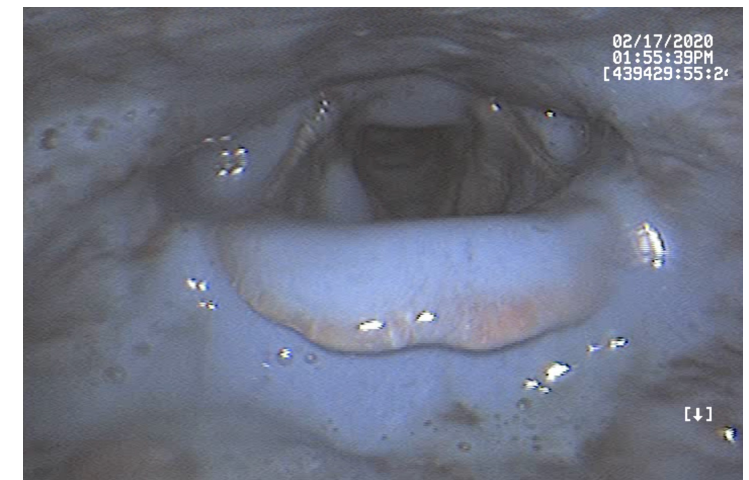

Severe



# Piriforms (Yale); Hypopharynx (VASES)

None

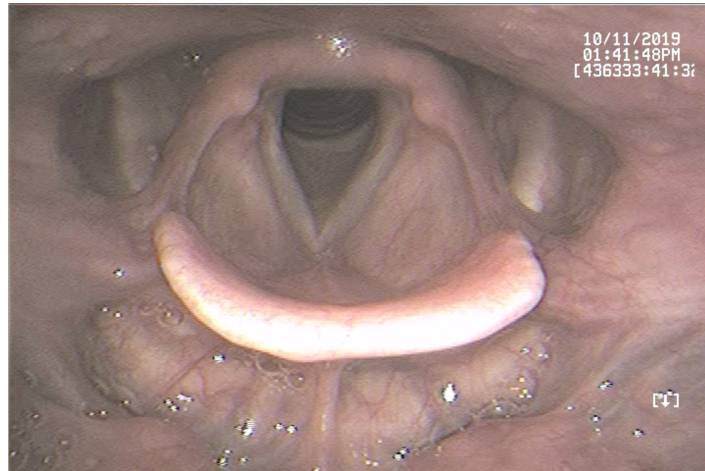

Trace

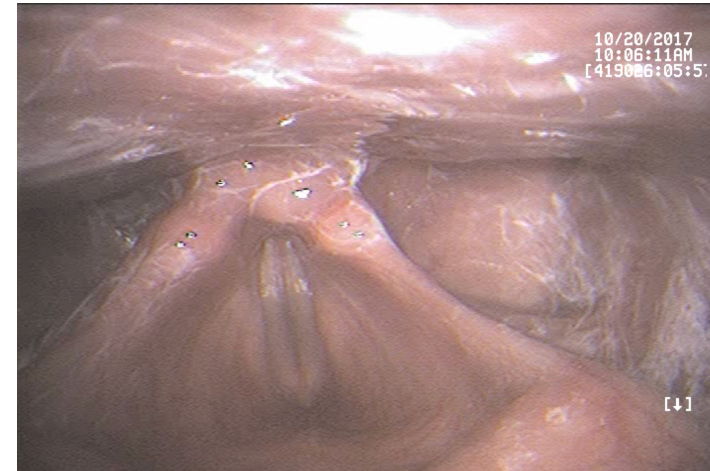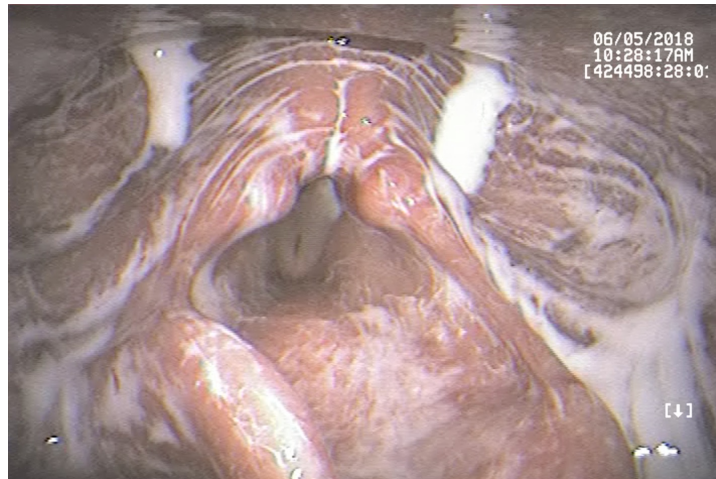

Mild

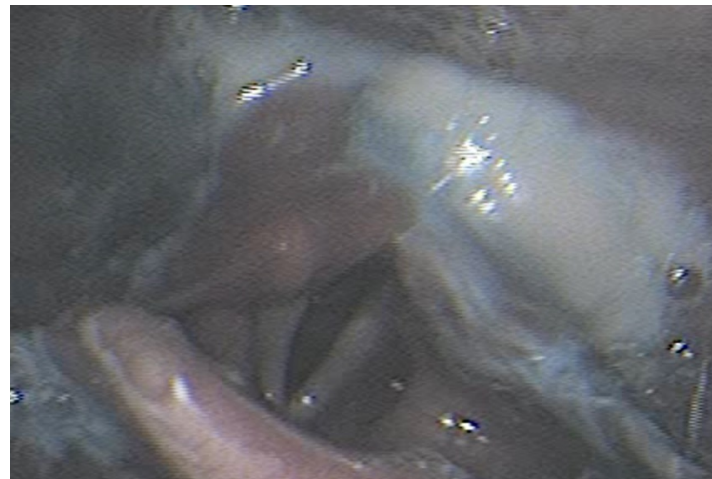

Moderate

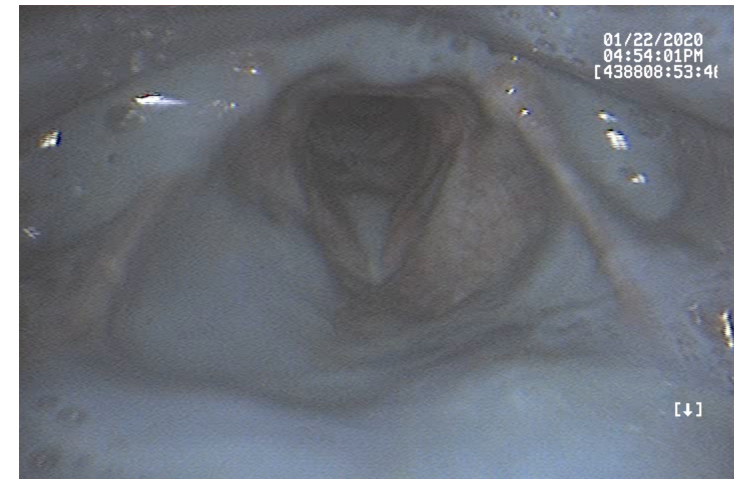

Severe

# Epiglottitis (BRACS & VASES)

None

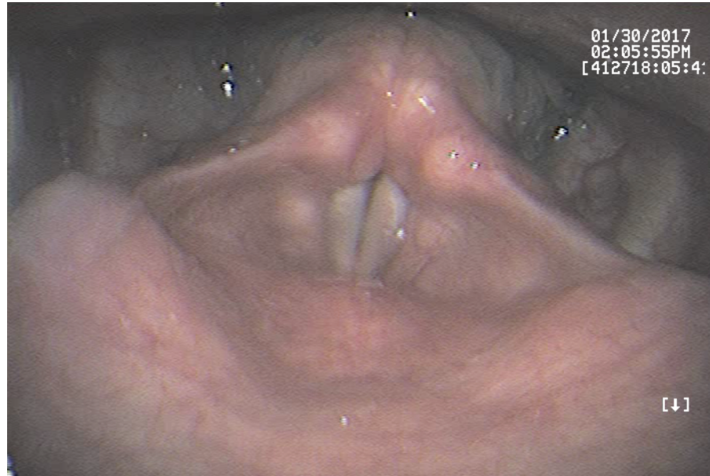

$< 1/3$

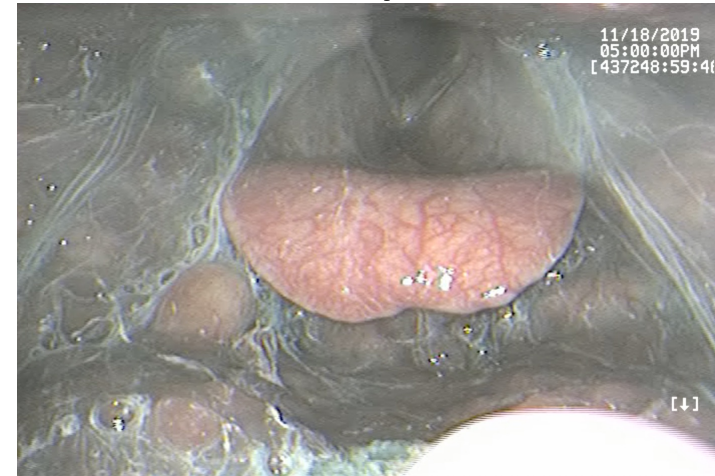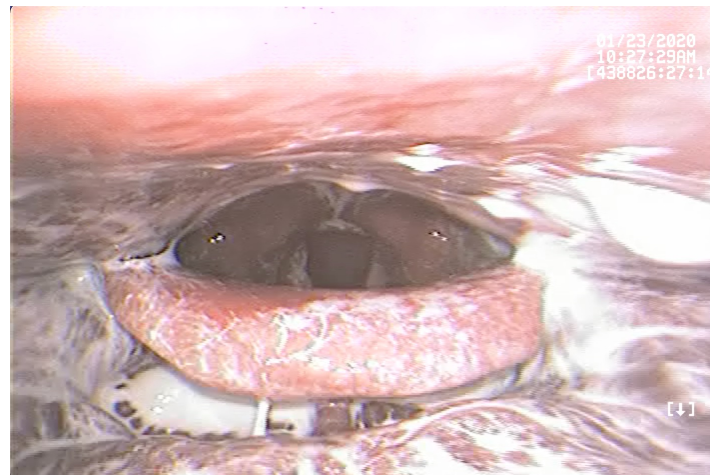

$1/3 - 2/3$

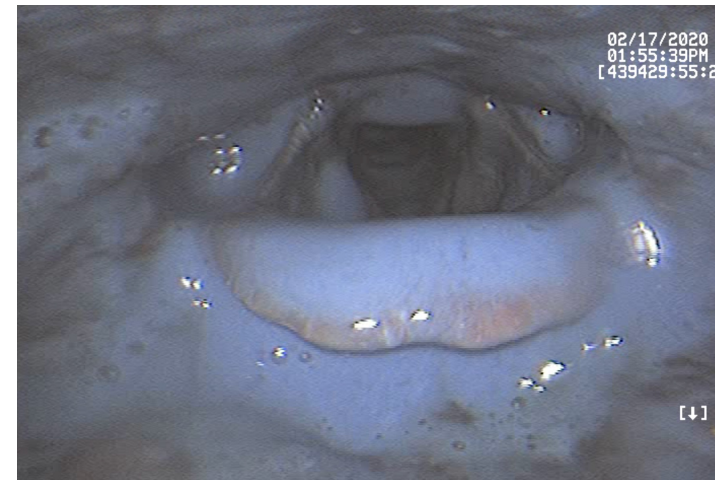

$> 2/3$



# Laryngeal Vestibule (BRACS & VASES)

None

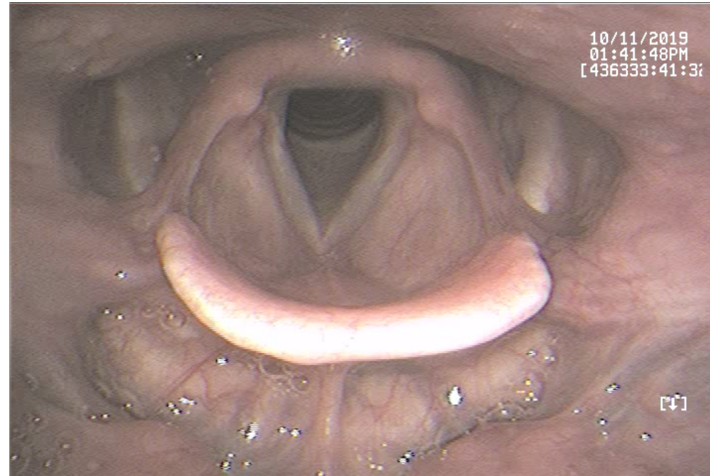

$< 1/3$

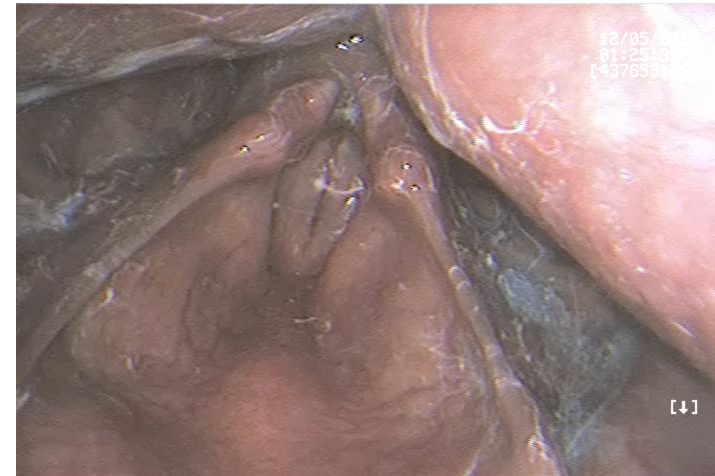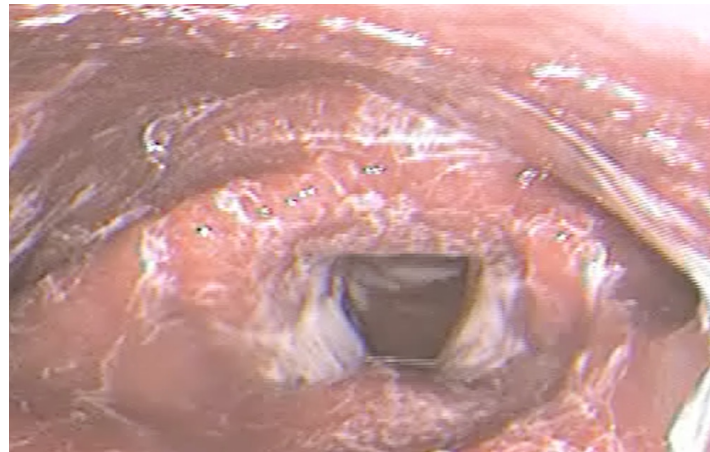

$1/3 - 2/3$

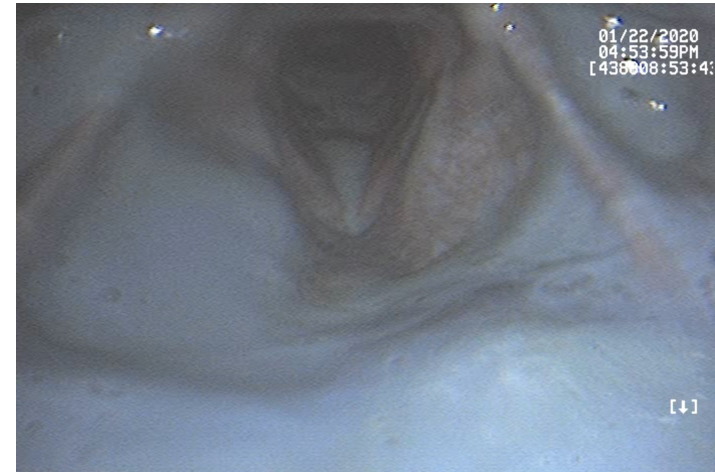

$> 2/3$



# Vocal Folds (BRACS & VASES)

None

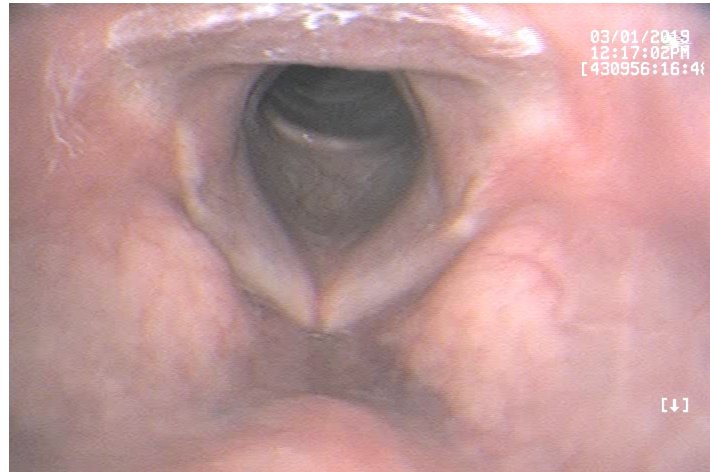

$< 1/3$

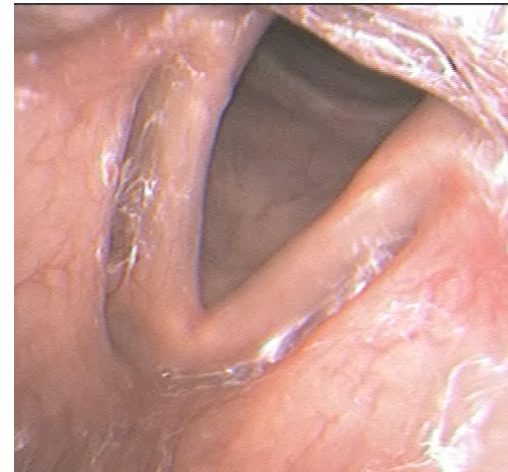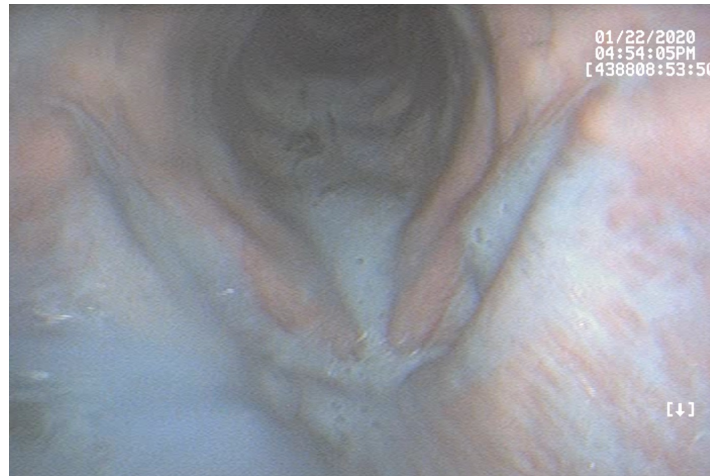

$1/3 - 2/3$

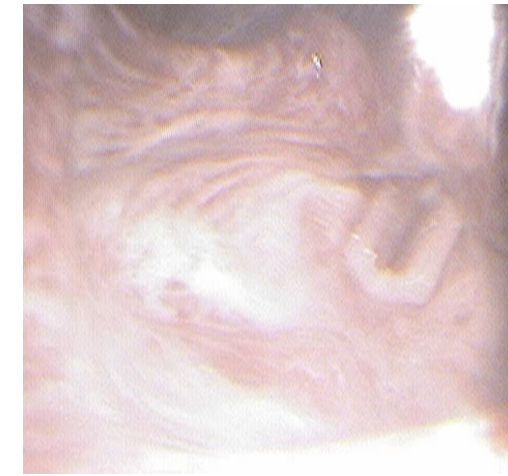

$> 2/3$

# Subglottis (BRACS & VASES)

None



$< 1/3$

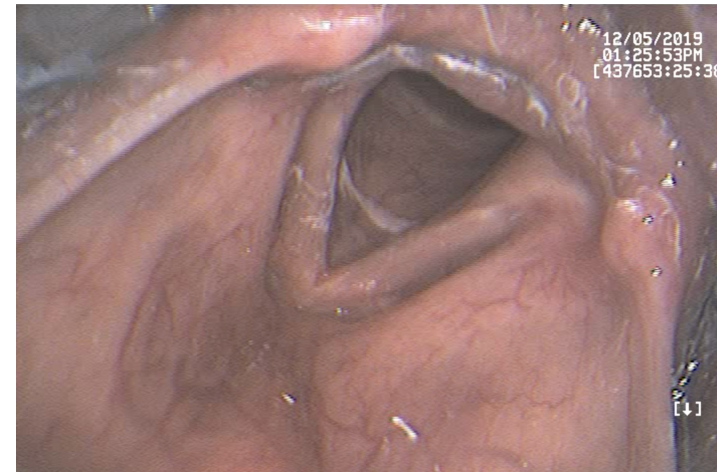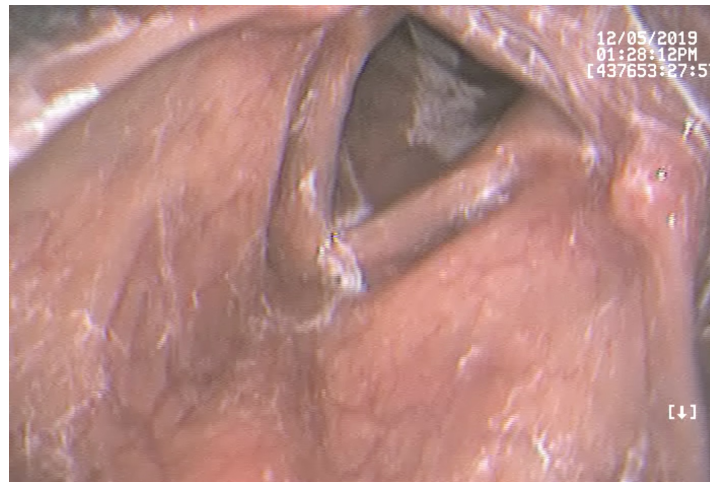

$1/3 - 2/3$

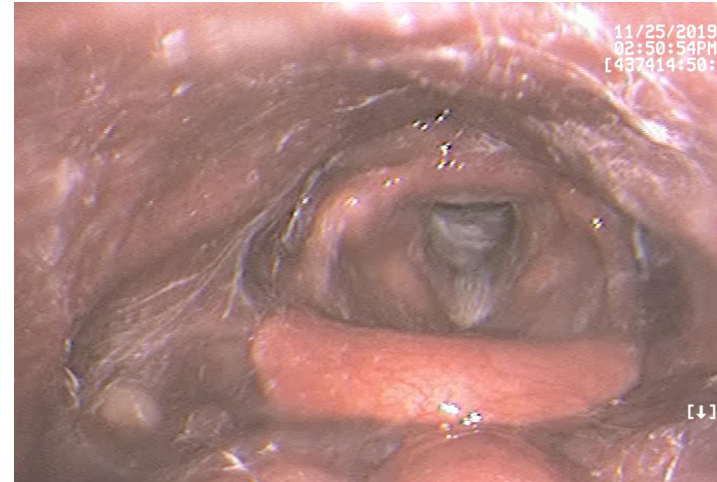

$> 2/3$
